# 1 Emotional responsiveness task in emotional distress:

## 2 correlated of functional neuroimaging in anorexia and bulimia

3  
4 Federico D'Agata<sup>a,b\*</sup>✉, PhD, Paola Caroppo<sup>c\*</sup>, MD, PhD, Angela Spalatro<sup>a</sup>, MD, PhD, Luca  
5 Lavagnino<sup>d</sup>, MD, PhD, Giovanni Abbate Daga<sup>a</sup>, MD, Andrea Boghi<sup>e</sup>, MD, Mauro Bergui<sup>a</sup>,  
6 MD, Alessandro Cicerale<sup>a</sup>, PhD, Benedetto Vitiello<sup>f</sup>, PhD, Secondo Fassino<sup>a</sup>, MD, Birgit  
7 Derntl<sup>g\*\*</sup>, PhD, Federico Amianto<sup>a\*\*</sup>, MD, PhD

8  
9 a Department of Neurosciences, University of Torino, Turin, Italy

10 b Computational Imaging Group for MR diagnostics & therapy, Center for Image Sciences, University  
11 Medical Center Utrecht, The Netherlands

12 c Fondazione IRCCS Istituto Neurologico Carlo Besta, Milan, Italy

13 d UT Center of Excellence on Mood Disorders, Department of Psychiatry and Behavioral Sciences, UT  
14 Houston Medical School, Houston, TX, USA

15 e ASL TO2 San Giovanni Bosco Hospital, Turin Italy

16 f Department of Public Health and Pediatric Sciences, University of Torino, Turin, Italy

17 g Department for Psychiatry and Psychotherapy, University Hospital Tübingen, Tübingen, Germany

18  
19 \* D'Agata F and Caroppo P equally contributed to this work

20 \*\* Derntl B and Amianto F equally contributed to this work

21  
22 ✉ Corresponding author: Federico D'Agata, PhD, Neurosciences Department, C.So  
23 Raffaello, 30 - 10125, Turin, Italy, Tel: +390116707705; Fax: +390116963487, Email:  
24 federico.dagata@unito.it

25 Submission field: neuroimaging (1st), clinical neurophysiology and neuropsychology (2nd)

26 Running title: Negative emotions fMRI in AN and BN

27 Keywords: eating disorders; emotion processing; therapeutic resistance; neuroimaging

28 Abstract: 203 words, All texts: 3670 words, Figures: 2, Tables: 2, Supp Information: 1 pdf.

29 **Abstract**

30 Aim: The present study aims to extend the knowledge of the neural correlates of emotion  
31 processing in first episode subjects affected by anorexia nervosa (AN) or bulimia nervosa  
32 (BN). We applied an emotional distress paradigm targeting negative emotions thought to  
33 be relevant for interpersonal difficulties and therapeutic resistance mechanisms.

34 Methods: The current study applied a neuroimaging paradigm eliciting affective responses  
35 to 44 female participants with newly diagnosed AN or BN and 20 matched controls. The  
36 measurements also included an extensive assessment comprised of clinical scales,  
37 neuropsychological tests, measures of emotion processing and empathy.

38 Results: AN and BN did not differ from controls in terms of emotional response, emotion  
39 matching, self-reported empathy and cognitive performance. However, scores of eating  
40 disorder and psychopathological clinical scores, as well alexithymia levels, were increased  
41 in AN and BN. On a neural level, no significant group differences emerged, even when  
42 focusing on a region of interest selected a priori: the amygdala.

43 Conclusions: Our data are against the hypothesis that participants with AN or BN display a  
44 reduced emotional responsiveness. This supports the hypothesis that relational difficulties,  
45 as well as therapeutic resistance, are not secondary to simple difficulty in feeling and  
46 identifying basic negative emotions in AN and BN participants.

## 47 **1. Introduction**

48 Anorexia nervosa (AN) and Bulimia nervosa (BN) are the two major Eating Disorders (ED):  
49 serious and complex psychiatric conditions with a multifactorial biopsychosocial  
50 pathogenesis often characterized by a chronic and disabling course and only partial  
51 therapeutic success [1,2]. Young girls are especially affected by AN, which is the  
52 pathology with the highest mortality risk and the lowest response to treatment across ED  
53 [3]. Prioritizing the treatment of symptoms results in better outcomes in BN and allows  
54 dealing with the main cause of mortality in AN [4]. It remains controversial whether doing  
55 so ignores core psychopathological elements, linked to more complex symptoms and long-  
56 term outcomes such as relationship difficulties or impairments in affect regulation,  
57 reflective functioning, and coherence of mind [5]. Psychotherapeutic treatment often  
58 focuses on these aspects and therapists are frequently faced with marked difficulty in  
59 engaging subjects affected by AN and maintaining treatment adherence [6]. In BN the  
60 difficulties are related to coping with high emotional arousal when facing social and  
61 affective stimuli. These difficulties also challenge a complex therapeutic approach [7].

62 The problems of individuals affected by ED in social interactions and psychotherapeutic  
63 engagement are indicators of serious difficulties in the management of interpersonal  
64 relationships, as well as emotional dysregulation [8]. Although not included in the current  
65 diagnostic criteria of ED (DSM-5 and ICD-10), emerging evidence points to deficits in  
66 socioemotional functioning [9]. Consequently, several modern therapeutic models  
67 incorporate the role of emotional difficulties, social anxiety and poor social support in the  
68 maintenance of the disorder [8].

69 Empathy represents a core function for social coherence and building relationships [10].  
70 Based on the abovementioned socio-emotional difficulties and related problems in ED, one  
71 may assume that empathy is systematically altered in ED and its impairment potentially  
72 represents a relevant risk factor. Several studies applied self-reported empathy measures

73 or assessed emotion recognition performance but reported mixed results [11–14]. Thus, it  
74 is unclear how much emotion processing, empathy and social competencies are affected  
75 in ED and what mechanisms mediate the insurgence of relational difficulties.

76 The majority of neuroimaging studies in the field of ED have investigated the  
77 neurobiological correlates of body shape, reward and food stimuli [15,16], while the  
78 number of studies focusing on emotion/empathy is still scarce and almost limited to the  
79 functional magnetic imaging (fMRI) correlates of implicit and/or explicit face emotion  
80 processing in patients affected by AN [17–22]. In BN much less is known regarding the  
81 neural circuits underlying emotion processing [16] and hardly any neuroimaging study  
82 adopted a transdiagnostic approach by including both AN and BN.

83 The present study aimed to extend the knowledge of the neural correlates of emotion  
84 processing in first-episode young women affected by AN or BN, using an emotional  
85 response fMRI paradigm focusing on negative emotions, as these could be relevant for  
86 interpersonal problems and therapeutic resistance mechanisms [8]. The importance of  
87 selecting first-episode participants derives from the aim of excluding secondary effects of  
88 the disorders and of prolonged or repeated therapeutic interventions on brain functioning.

89 We compared performance of women affected by AN or BN and a group of matched  
90 healthy controls with an extensive assessment that included clinical scales,  
91 neuropsychological tests, and self-report questionnaires of emotion processing and  
92 empathy and with fMRI. Based on previous studies we hypothesized: i) behavioral and/or  
93 self-reported differences in emotion processing/empathy measures between the three  
94 groups, ii) group differences for the activation of specific limbic areas known to be highly  
95 involved in emotional processing and empathy, i.e. amygdala [23–26], and iii) a critical  
96 contribution of neuroimaging data to distinguish between the three groups as compared to  
97 the behavioral or self-report measures, as it should be a less biased and more sensitive  
98 measurement tool.

## 99 **2. Materials and Methods**

### 100 **2.1 Sample**

101 Twenty-five female individuals affected by AN (20 restricting, 5 binge/purging) and 19 by  
102 BN (15 purging, 4 not purging), were enrolled from the outpatient service of the Pilot  
103 Centre for the Diagnosis and Treatment of Eating Disorders of the Department of  
104 Neuroscience, “AOU Città della Salute e della Scienza” of Turin, Italy. ED was diagnosed  
105 using the Structured Clinical Interview for DSM-IV-TR (SCID). The inclusion criteria for the  
106 study were: female sex; age 16-30 years; right-handedness (assessed by Edinburgh  
107 Handedness Inventory); body mass index (BMI) from 15.0 to 17.5 for AN and from 19.0 to  
108 25.0 for BN; no past or present mental disorder except for the current ED first-episode; no  
109 axis II disorders (assessed by SCID II, [27]); no current or past pharmacological treatment;  
110 no drug or alcohol abuse; no history of diabetes or other somatic diseases, no past or  
111 present psychotherapy treatment and duration of symptoms shorter than 2 years. From a  
112 global sample of 109 assessed ED participants, only 44 met the inclusion criteria and were  
113 finally enrolled in the present study.

114 Twenty healthy women were recruited as controls (CN) through local advertisement. The  
115 inclusion criteria for the CN group were like those for BN (BMI range 19.0-25.0), except for  
116 having neither a current nor lifetime mental disorder.

117 All participants gave their written informed consent to the study. For minors (3 AN, 1 BN),  
118 written informed consent was obtained from parents. The study was approved by the local  
119 Ethics Committee [Comitato Etico Interaziendale A.O.U. Città della Salute e della Scienza  
120 di Torino - A.O. Ordine Mauriziano - A.S.L. Città di Torino, approval #12042010].

### 121 **2.2 Clinical and self-report data**

122 The clinical assessment included the *Eating Disorder Inventory 2* (EDI-2) [28], the  
123 *Symptom Checklist-90* (SCL-90) [29], the *Empathy Quotient* [30] and the *Toronto*

124 *Alexithymia Scale* (TAS-20) [31]. Detailed information on the scales can be found in the  
125 supplementary material (section S1.1).

## 126 **2.3 Neuropsychological tests**

127 All participants performed a comprehensive neuropsychological testing battery assessing  
128 attention, memory and executive functions to account for possible interference of cognitive  
129 differences in emotional processing among groups. Detailed information can be found in  
130 the supplementary material (section S1.1).

## 131 **2.4 MRI acquisition**

132 MRI data were collected on a Philips Achieva 1.5T scanner. First, participants underwent  
133 the affective responsiveness task that comprised 480 continuous gradient-recalled EPI  
134 volumes (TR=2300ms, TE=40ms, FA=90°, 30 axial slices, matrix=128x128, slice  
135 thickness=4mm, no gap, voxel size=1.8x1.8x4mm<sup>3</sup>, field of view=23cm). After fMRI,  
136 anatomical high-resolution images were acquired using T1-weighted 3D Turbo Field-Echo  
137 sequence (matrix=256x256, 190 contiguous sagittal slices, TR=7ms, TE=3ms, TFE  
138 shots=89, voxel size 1x1x1mm<sup>3</sup>).

### 139 **2.4.1 Affective responsiveness fMRI paradigm**

140 We used a modified and shortened version of a previously tested fMRI paradigm [32–35].  
141 Forty short written sentences were presented, describing real-life situations inducing  
142 anger, fear, disgust (e.g. 'You are walking in a meadow and step on dog excrement' for  
143 disgust) or containing a neutral content (e.g. 'You are on the couch watching television').  
144 As reported previously, stimuli were validated by independent female and male raters [32]  
145 and only stimuli that were clearly classified as belonging to one emotional category (>70%)  
146 were selected for the study. We presented 10 sentences per condition (disgust, anger,  
147 fear, neutral). Participants had to imagine how they would feel if they were experiencing  
148 those situations. We were particularly interested in the emotional response to distressful

149 situations. Stimuli were presented for 7 sec. After emotion induction participants were  
150 presented with two facial expressions, one with the same emotion as the induction  
151 (correct) and the other with a match chosen randomly from the other options and asked to  
152 choose between the two. Participants had a maximum of 7 sec to respond. The response  
153 was followed by 7 sec of inter-trial-interval (cross fixation), then another trial started. The  
154 number of correct answers for the matching of emotional sentences and faces was  
155 recorded as a proxy of emotion processing (score 0-30). A right answer likely means a  
156 correct emotional response to the imaginary situation, correct identification of the emotions  
157 in the two displayed faces, and correct comparison and matching. After a neutral situation,  
158 participants were presented with two neutral faces, one male and one female, and they  
159 had to identify the female within 7 seconds. The number of correct answers was recorded  
160 as a proxy of the sustained attention and active participation to the task (score 0-10).  
161 The order presentation of neutral and emotional stimuli was counterbalanced across  
162 participants. Figure 1 illustrates an example of the task. Further information on the  
163 experimental design can be found in the supplementary material (section S1.2).

164

165 Figure 1: Illustration of the emotional response task

166 In every trial a short sentence with negative or neutral valence was presented, after which  
167 the participant was asked to choose between two stimuli (one correct and one wrong) and  
168 selected the facial expression that best matched the induced feelings. The paradigm  
169 consisted of 30 negative emotion trials (10 anger, 10 fear, 10 disgust) and 10 neutral trials.

170

## 171 **2.5 Data analyses**

### 172 **2.5.1 Statistical comparison of behavioral data**

173 Statistical analyses were performed using IBM SPSS Statistics for Windows (Version 20.0.  
174 Armonk, NY: IBM Corp.) and level of significance was set to  $p < .05$  corrected with False  
175 Discovery Rate (FDR  $q = .05$ ) to account for multiple comparisons [36]. Behavioral and  
176 questionnaire data were compared using one-way ANOVAs with group as between-  
177 subjects factor. When needed, we performed a repeated measure ANOVA (rmANOVA)  
178 with emotion as within-subject factor. We used Tukey post-hoc tests to disentangle group  
179 differences when the main effect was significant. Effect sizes are reported using partial eta  
180 squared ( $\eta^2$ ).

### 181 **2.5.2 FMRI data processing**

182 Functional data were preprocessed using SPM8 (<http://www.fil.ion.ucl.ac.uk/spm>) on  
183 MATLAB 7.5 environment. Images were motion corrected, normalized into the  
184 standardized stereotaxic MNI space using T1 coregistered images and spatially smoothed  
185 using an isotropic Gaussian kernel with a full-width-at-half-maximum (FWHM) of 8mm.  
186 The estimation of head motion was tested with a procedure previously described by Yuan  
187 et al. [37]. The magnitude of head motion for six parameters (three for shift and three for  
188 rotation) was obtained for each participant and the averaged head motion parameters  
189 were calculated. An ANOVA was computed to test for differences between the groups.  
190 The result was non-significant, both for rotation ( $p = .8$ ; average movement  $\times$  TR =  $0.05^\circ$ )  
191 and for shift ( $p = .6$ ; average movement  $\times$  TR =  $0.1\text{mm}$ ). Yuan and colleagues suggest  
192 exclusion of participants with head motion exceeding 4 SDs (in our sample: rotation  $> 0.1^\circ$ ;  
193 shift  $> 0.2\text{mm}$ ). None of our participants exceeded this threshold; therefore, data of all  
194 women were included in the analyses.



195 *Task-based fMRI analyses:* For this event-related design, each stimulus type was modeled  
196 with a separate regressor convolved with the canonical hemodynamic response function  
197 (HRF). Also, responses to the two different tasks were modeled as separate regressors.  
198 The participants gave correct answers in more than 85% of the trials, and the number of  
199 wrong responses did not differ significantly between groups ( $p=.5$ ). The time-series  
200 movement estimated parameters (3 translations, 3 rotations) were included as covariates  
201 of no interest and the HRF time derivative was modelled.

202 Statistical analysis was performed with a two-step hierarchical estimation. At a first  
203 individual level, we saved three contrast images for every participant: disgust (D), anger  
204 (A), fear (F) compared to the neutral condition N ( $D>N$ ,  $A>N$ ,  $F>N$ , the contrasts compared  
205 10 emotional trials with 10 neutral trials for each of the three conditions). We did not  
206 include in this model the response related regressors (button press), as we only focused  
207 on the neural activation during imagined situations. Contrast images from all participants  
208 were included in three second-level random-effects analysis to detect group differences,  
209 never mixing D, A and F or overrepresenting in the same model the N trials. We performed  
210 three one-way ANCOVA (General Linear Model) with GROUP as a between-subjects  
211 factor (AN, BN, CN) and controlling for atrophy. As cerebral atrophy could be a  
212 confounding factor in ED, as previously reported [38], we used VBM8 toolbox [39] to  
213 automatically extract gray matter (GM), white matter (WM) and cerebro-spinal fluid (CSF)  
214 volumes of all the participants. We compared parameters between groups including the  
215 significantly different brain volumes (CSF) as a covariate of no interest. Statistical  
216 inferences were performed by applying the Random Field Theory. Maps were thresholded  
217 at the  $p<.05$  FWE cluster-level corrected (FWEc, meaning uncorrected  $p<.001$ , filtered for  
218 small clusters or cluster extent  $>$ FWE cluster size threshold).

219 *Emotion ROI analyses:* We performed region of interest (ROI) analyses on brain areas (left  
220 and right amygdala) that were selected a priori as they have been consistently reported as

221 key regions in emotion processing. To do so, we used the MarsBaR region of interest  
222 toolbox for SPM (<http://marsbar.sourceforge.net>). ROIs mean signals were extracted using  
223 the AAL atlas delineated ROI in the MNI space. We used the same statistical ANCOVA  
224 models of the whole-brain analysis previously reported for every ROI separately. We  
225 applied Bonferroni correction to control for multiple comparison errors ( $n=2$ ,  $p<.025$ ).

## 226 3. Results

### 227 3.1 Subjects data

#### 228 3.1.1 Demographic, self-report and brain volume data

229 The demographic and clinical data are shown in Table 1. Groups did not differ in terms of  
230 age as well as educational level. However, BMI of AN was significantly lower than in BN  
231 and CN, while BN and CN did not differ. Disease duration was similar for AN and BN. All  
232 EDI-2 scores were different among groups, except for EDI-2 Maturity Fear. Post-hoc  
233 analyses of the significant group effects showed differences in ED compared to CN for all  
234 the psychopathological scales with AN,BN>CN (AN=BN). The only exceptions were Body  
235 dissatisfaction and Ineffectiveness, with BN>AN>CN and Bulimia with BN>AN,CN  
236 (AN=CN). SCL-90 dimensions were all higher in ED compared to CN (see Supplementary  
237 Table S1).

238

239 **Table 1. Demographic and clinical data separately for the three groups**

| Data                     | AN       | BN       | CN       | p               | $\eta^2$ | post-hoc |
|--------------------------|----------|----------|----------|-----------------|----------|----------|
| Age [y]                  | 22±5     | 22±5     | 23±3     | .715            | .01      | -        |
| Education [y]            | 14±2     | 15±2     | 16±2     | .133            | .06      | -        |
| BMI [kg/m <sup>2</sup> ] | 16.1±1.0 | 21.9±2.3 | 21.5±2.2 | <b>&lt;.001</b> | .68      | AN<BN=CN |

Negative emotions fMRI in AN and BN

|                                |        |        |        |                 |     |          |
|--------------------------------|--------|--------|--------|-----------------|-----|----------|
| <b>Disease duration* [mos]</b> | 11±7   | 11±5   | -      | .999            | .01 | -        |
| <b>GM [cc]</b>                 | 587±42 | 618±50 | 601±55 | .129            | .07 | -        |
| <b>WM [cc]</b>                 | 497±30 | 504±44 | 493±50 | .719            | .01 | -        |
| <b>CSF [cc]</b>                | 212±19 | 193±22 | 191±18 | <b>.001</b>     | .20 | AN>BN=CN |
| <b>EDI-2</b>                   |        |        |        |                 |     |          |
| <i>Drive for Thinness</i>      | 14±6   | 17±6   | 2±3    | <b>&lt;.001</b> | .64 | AN=BN>CN |
| <i>Bulimia</i>                 | 3±4    | 12±6   | 2±2    | <b>&lt;.001</b> | .53 | BN>AN=CN |
| <i>Body dissatisfaction</i>    | 12±7   | 21±6   | 7±6    | <b>&lt;.001</b> | .46 | BN>AN>CN |
| <i>Ineffectiveness</i>         | 9±5    | 14±8   | 4±5    | <b>&lt;.001</b> | .31 | BN>AN>CN |
| <i>Perfectionism</i>           | 6±4    | 6±5    | 3±3    | <b>.040</b>     | .11 | AN=BN>CN |
| <i>Interpersonal distrust</i>  | 7±5    | 8±4    | 2±3    | <b>&lt;.001</b> | .29 | AN=BN>CN |
| <i>Interoceptive awareness</i> | 9±7    | 14±8   | 2±3    | <b>&lt;.001</b> | .41 | AN=BN>CN |
| <i>Maturity fears</i>          | 8±7    | 6±5    | 5±4    | .115            | .07 | -        |
| <i>Asceticism</i>              | 8±5    | 10±4   | 3±2    | <b>&lt;.001</b> | .41 | AN=BN>CN |
| <i>Impulse regulation</i>      | 7±6    | 8±6    | 1±1    | <b>&lt;.001</b> | .32 | AN=BN>CN |
| <i>Social insecurity</i>       | 7±4    | 9±5    | 2±3    | <b>&lt;.001</b> | .35 | AN=BN>CN |

240 AN = Anorexia Nervosa, BN = Bulimia Nervosa, CN = Normal controls, values represented mean ± SD  
 241 EDI-2 = Eating Disorder Inventory 2, GM = gray matter, WM = white matter, CSF = cerebrospinal fluid  
 242 p = ANOVA probability values for F(2, 61), \* is t(42) and d, in bold FDR q<.05,  $\eta^2$  = partial eta square

243

244 Self-reported empathy scores did not differ between groups (p=.153). The TAS-20 total  
 245 score as well as the Difficulty in identifying and Difficulty in describing feelings subscales  
 246 displayed increased alexithymia in AN and BN compared to CN (all p<.001), but no  
 247 differences were evident between the two clinical groups (all p>.503).

248 For brain atrophy, the CSF global volume was increased in AN compared to both BN  
 249 (p<.010) and CN (p<.002), while BN and CN did not differ (p<.895).

250 **3.1.2 Neuropsychological data**

251 Regarding neuropsychological performance, a significant group effect emerged only for  
 252 the Stroop Color-Word Test ( $p < .003$ ). Post-hoc tests indicated that AN and BN showed  
 253 greater interference than CN (AN > CN,  $p < .014$ ; BN > CN,  $p < .004$ ), while the clinical groups  
 254 did not differ significantly (AN = BN,  $p < .812$ ). For all other tasks, no significant group  
 255 difference emerged (all FDR corrected  $p > .05$ ). Please see Supplementary Table S2 for  
 256 details.

257 **3.1.3 Behavioral performance during affective responsiveness task**

258 The rmANOVA revealed a significant task effect ( $p < .001$ ,  $\eta^2 = .46$ ), but no main effect of  
 259 group ( $p < .329$ ) and no significant task-by-group interaction ( $p < .980$ ). Post-hoc analyses of  
 260 the significant emotion effect indicated that anger was the most difficult emotion to match  
 261 (anger < fear,  $p < .001$ ; anger < disgust,  $p < .001$ ) and disgust the easiest (disgust > anger,  
 262  $p < .001$ ; disgust > fear,  $p < .008$ ). The control task was easier than all the emotion tasks (all  
 263  $p < 0.001$ ). Please see Table 2 for further details.

264

265 **Table 2. Self-reported empathy, alexithymia and behavioral performance during affective**  
 266 **response task for the three groups**

| Data                                   | AN    | BN    | CN    | p               | $\eta^2$ | post-hoc |
|----------------------------------------|-------|-------|-------|-----------------|----------|----------|
| <b>Empathy Quotient</b>                | 52±10 | 48±12 | 54±9  | .153            | .06      | -        |
| <b>TAS-20</b>                          |       |       |       |                 |          |          |
| <i>Difficulty identifying feelings</i> | 23±6  | 24±6  | 12±5  | <b>&lt;.001</b> | .48      | AN=BN>CN |
| <i>Difficulty describing feelings</i>  | 17±5  | 17±5  | 11±6  | <b>&lt;.001</b> | .23      | AN=BN>CN |
| <i>Externally oriented thinking</i>    | 18±4  | 20±8  | 15±6  | .102            | .04      | -        |
| <i>Total score</i>                     | 59±10 | 61±15 | 38±12 | <b>&lt;.001</b> | .41      | AN=BN>CN |

**fMRI Affective Responsiveness**

|                    |      |      |      |      |      |   |
|--------------------|------|------|------|------|------|---|
| <i>Disgust</i>     | 9±1  | 9±2  | 9±1  | .937 | .02  | - |
| <i>Anger</i>       | 7±2  | 7±1  | 7±1  | .249 | .04  | - |
| <i>Fear</i>        | 8±1  | 8±2  | 8±1  | .434 | <.01 | - |
| <i>Total score</i> | 24±3 | 23±4 | 24±2 | .527 | .03  | - |

267 AN = Anorexia Nervosa, BN = Bulimia Nervosa, CN = Normal controls, values represent mean ± SD  
268 TAS-20 = Toronto Alexithymia Scale 20. p = ANOVA probability values for F(2,61),  
269 in bold FDR q<.05,  $\eta^2$  = partial eta square

270

## 271 **3.2 Imaging negative emotional situations**

### 272 **3.2.1 Whole-brain analyses**

273 The contrasts for the group factor did not show significant activation differences in the  
274 brain.

### 275 **3.2.2 Amygdala ROI analysis**

276 ROI analyses of the left and right amygdala revealed no significant differences between  
277 group, confirming whole-brain results (see Figure 2).

278

279 Figure 2: ROI analysis differences between groups

280 The figure plots the coefficients extracted from left and right amygdala during affective  
281 responsiveness fMRI for the different groups (AN = Anorexia Nervosa, BN = Bulimia  
282 Nervosa, CN = Normal controls, L = left, R = right, D = disgust, A = anger, F = fear, N =  
283 neutral). The stars indicate significant differences (p<.05), you can observe that no  
284 difference could be observed between groups in the left and right amygdala for negative  
285 emotions.

286

## 287 **4. Discussion**

288 This study's main goal was to address affective responsiveness to negative emotional  
289 situations in treatment-naïve young females with AN or BN and matched controls. Thus,  
290 this study is one of the few that directly compare neuroimaging activation of different  
291 groups of ED with each other, thereby highlighting disorder-specific as well as  
292 transdiagnostic dysfunctional symptoms.

293 Based on previous literature we hypothesized to observe significant group differences in  
294 empathy and emotion processing between controls and ED. Instead, and in part  
295 unexpectedly, we detected mixed results: no significant group differences in behavioral  
296 performance or self-reported empathy, but significant differences in alexithymia. We also  
297 found no specific differences in neural activation for emotions. As expected, eating-specific  
298 and general psychopathology scales sharply distinguished participants affected by ED  
299 from healthy controls. Eating-specific scales like Body Dissatisfaction, Ineffectiveness and  
300 Bulimia further differentiated the clinical samples, with higher scores in BN.

301 **Neural network of affective responsiveness in ED.** The emotional response paradigm  
302 we used activates consistently a set of brain regions [32–35], including the amygdala,  
303 which have been demonstrated to be involved in emotional empathy [23–25]. Interestingly,  
304 we did not observe a significant group effect for the amygdala or other brain areas. This  
305 lack of a significant group-by-emotion interaction in neural activation during our emotional  
306 responsiveness task is partly in line with previous reports of no group differences in neural  
307 activation between healthy controls and acute as well as recovered AN for explicit emotion  
308 recognition [17–22].

309 **Empathy and affective responsiveness in ED.** Previous findings on empathy or emotion  
310 recognition are inconsistent: while some reported decreased self-reported emotional  
311 empathy but normal emotion recognition in acute AN [12], others observed no significant  
312 alteration in self-reported empathy in AN [13]. Additionally, a significant impairment in

313 understanding others' emotions and in the regulation of their own emotions has been  
314 reported in AN [40,41]. However, studies based on film clips did not find any specific  
315 abnormalities in emotion processing and emotional ratings, only attentional biases [42].  
316 Some researchers pointed out that at least in a subgroup of individuals affected by BN,  
317 empathic mentalization was not impaired at all [43,44].  
318 It has been hypothesized that the mixed results derived from the relatively poor sensitivity  
319 and specificity of the applied instruments, as already evidenced in the literature [30], but  
320 also considering our negative findings with a highly sensitive measurement of the brain  
321 activity it seems an incomplete explanation. A recent review [14] suggests an alternative  
322 explanation: ED individuals can recognize others' basic emotions, but they lose this skill  
323 when emotions become more complex and are expressed within a relationship. Relevant  
324 to this kind of hypothesis, a dysfunctional middle prefrontal cortex (MPFC) activation has  
325 been reported for processing of visual stimuli depicting couples in intimate relationships in  
326 acute and recovered AN, pointing to a state-independent alteration of MPFC activation  
327 [45,46]. Additionally, the significantly elevated alexithymia scores in both clinical groups  
328 may be also associated with MPFC dysfunction, as this is an important hub for the  
329 interhemispheric integration and transfer [47]. Thus, MPFC function may be compromised  
330 in ED indicating a transdiagnostic alteration that seems especially relevant for the  
331 processing of complex stimuli, social functioning, and interpersonal interactions.

#### 332 **4.1 Limitations**

333 Despite the novelty and relevance of this investigation of emotional responsiveness, the  
334 study had several limitations that need to be acknowledged. First, in principle, the fMRI  
335 task could be solved with different strategies, limiting the emotional response in favor of  
336 cognitive processing, but our finding of a similar activation of the amygdala for all groups  
337 limits the likelihood of this possibility. Second, we only investigated a small fragment of

338 emotion processing and social cognition. More distinct differences between ED and  
339 controls could emerge if other processes that vary in complexity would be studied like  
340 affective vs. cognitive empathy or interpersonal affectivity and reactivity. Finally, different  
341 subtypes of participants (purging, non-purging) were included, but subsamples were too  
342 small to analyze their specific contributions.

## 343 **5. Conclusions**

344 Relying on self-report data and an affective responsiveness task, we must argue against  
345 the hypothesis that participants with ED display reduced emotional responsiveness. This  
346 supports the hypothesis that relational difficulties, as well as therapeutic resistance, are  
347 not secondary to simple difficulty in feeling and identifying basic negative emotions in first  
348 episode, treatment-naive AN and BN participants.

349 According to the theories which link the pathogenesis of anorexia nervosa to attachment  
350 processes [48,49], the present findings support the hypothesis that the difficulty in building  
351 meaningful relationships which characterize young women with ED may be more related to  
352 attachment issues based on early attachment experiences rather than from current  
353 difficulties in the emotional responsiveness to their own and others emotions.



354 **Acknowledgements**

355 The authors declare no conflicts of interest. This research received no specific grant from  
356 any funding agency, commercial or not-for-profit sectors.

357 The data that support the findings of this study are available from the authors, without  
358 undue reservation, to any qualified researcher.

359 **Authors contributions**

360 Conception and design of the study: FA, FDA, PC, LL, GAD, BD, SF.

361 Acquisition and analysis of data: FDA, AS, PC, LL, MB, AC.

362 Drafting the manuscript or figures: FA, FDA, AS, PC, LL, GAD, AB, MB, AC, BV, BD, SF.

## 363 **References**

- 364 1. Zipfel S, Wild B, Groß G, Friederich H-C, Teufel M, Schellberg D, et al. Focal  
365 psychodynamic therapy, cognitive behaviour therapy, and optimised treatment as  
366 usual in outpatients with anorexia nervosa (ANTOP study): randomised controlled  
367 trial. *Lancet*. 2014;383(9912):127–37.
- 368 2. Treasure J, Claudino AM, Zucker N. Eating disorders. *Lancet*. 2010;375(9714):583–  
369 93.
- 370 3. Fichter MM, Quadflieg N. Mortality in eating disorders - results of a large prospective  
371 clinical longitudinal study. *The International Journal of Eating Disorders*.  
372 2016;49(4):391–401.
- 373 4. Poulsen S, Lunn S, Daniel SIF, Folke S, Mathiesen BB, Katznelson H, et al. A  
374 randomized controlled trial of psychoanalytic psychotherapy or cognitive-behavioral  
375 therapy for bulimia nervosa. *The American Journal of Psychiatry*. 2014;171(1):109–  
376 16.
- 377 5. Tasca GA, Balfour L. Eating disorders and attachment: a contemporary  
378 psychodynamic perspective. *Psychodynamic Psychiatry*. 2014;42(2):257–76.
- 379 6. Hambrook D, Oldershaw A, Rimes K, Schmidt U, Tchanturia K, Treasure J, et al.  
380 Emotional expression, self-silencing, and distress tolerance in anorexia nervosa and  
381 chronic fatigue syndrome. *The British Journal of Clinical Psychology*. 2011;50(3):310–  
382 25.
- 383 7. Tapajóz P de Sampaio F, Soneira S, Aulicino A, Harris P, Allegri RF. Emotional  
384 reactivity to social stimuli in patients with eating disorders. *Psychiatry Research*.  
385 2015;229(3):887–94.

- 386 8. Fassino S, Abbate-Daga G. Resistance to treatment in eating disorders: a critical  
387 challenge. *BMC Psychiatry*. 2013;13(1):282.
- 388 9. Treasure J, Corfield F, Cardi V. A Three-phase Model of the Social Emotional  
389 Functioning in Eating Disorders: Social Emotional Functioning in Eating Disorders.  
390 *European Eating Disorders Review*. 2012;20(6):431–8.
- 391 10. Decety J, Jackson PL. The functional architecture of human empathy. *Behavioral and*  
392 *Cognitive Neuroscience Reviews*. 2004;3(2):71–100.
- 393 11. Lavender JM, Wonderlich SA, Engel SG, Gordon KH, Kaye WH, Mitchell JE.  
394 Dimensions of emotion dysregulation in anorexia nervosa and bulimia nervosa: A  
395 conceptual review of the empirical literature. *Clinical Psychology Review*.  
396 2015;40:111–22.
- 397 12. Morris R, Bramham J, Smith E, Tchanturia K. Empathy and social functioning in  
398 anorexia nervosa before and after recovery. *Cognitive neuropsychiatry*.  
399 2014;19(1):47–57.
- 400 13. Hambrook D, Tchanturia K, Schmidt U, Russell T, Treasure J. Empathy, systemizing,  
401 and autistic traits in anorexia nervosa: A pilot study. *British Journal of Clinical*  
402 *Psychology*. 2008;47(3):335–9.
- 403 14. Tchanturia K, Dapelo MAM, Harrison A, Hambrook D. Why Study Positive Emotions  
404 in the Context of Eating Disorders? *Current Psychiatry Reports*. 2015;17(1):537.
- 405 15. Lloyd EC, Steinglass JE. What can food-image tasks teach us about anorexia  
406 nervosa? A systematic review. *Journal of Eating Disorders*. 2018;6:31.

- 407 16. Donnelly B, Touyz S, Hay P, Burton A, Russell J, Caterson I. Neuroimaging in bulimia  
408 nervosa and binge eating disorder: a systematic review. *Journal of Eating Disorders*.  
409 2018;6:3.
- 410 17. Seidel M, King JA, Ritschel F, Boehm I, Geisler D, Bernardoni F, et al. Processing  
411 and regulation of negative emotions in anorexia nervosa: An fMRI study. *NeuroImage*  
412 *Clinical*. 2018;18:1–8.
- 413 18. Phillipou A, Abel LA, Castle DJ, Hughes ME, Gurvich C, Nibbs RG, et al. Self  
414 perception and facial emotion perception of others in anorexia nervosa. *Frontiers in*  
415 *Psychology*. 2015;6:1181.
- 416 19. Bang L, Rø Ø, Endestad T. Amygdala alterations during an emotional conflict task in  
417 women recovered from anorexia nervosa. *Psychiatry Research*. 2016;248:126–33.
- 418 20. Leppanen J, Cardi V, Paloyelis Y, Simmons A, Tchanturia K, Treasure J. FMRI Study  
419 of Neural Responses to Implicit Infant Emotion in Anorexia Nervosa. *Frontiers in*  
420 *Psychology*. 2017;8:780.
- 421 21. Cowdrey FA, Harmer CJ, Park RJ, McCabe C. Neural responses to emotional faces  
422 in women recovered from anorexia nervosa. *Psychiatry Research*. 2012;201(3):190–  
423 5.
- 424 22. Fonville L, Giampietro V, Surguladze S, Williams S, Tchanturia K. Increased BOLD  
425 signal in the fusiform gyrus during implicit emotion processing in anorexia nervosa.  
426 *NeuroImage: Clinical*. 2014;4:266–73.
- 427 23. Fan Y, Duncan NW, de Greck M, Northoff G. Is there a core neural network in  
428 empathy? An fMRI based quantitative meta-analysis. *Neuroscience & Biobehavioral*  
429 *Reviews*. 2011;35(3):903–11.

- 430 24. Engen HG, Singer T. Empathy circuits. *Current Opinion in Neurobiology*.  
431 2013;23(2):275–82.
- 432 25. Sergerie K, Chochol C, Armony JL. The role of the amygdala in emotional processing:  
433 A quantitative meta-analysis of functional neuroimaging studies. *Neuroscience and*  
434 *Biobehavioral Reviews*. 2008;32(4):811–30.
- 435 26. Lamm C, Decety J, Singer T. Meta-analytic evidence for common and distinct neural  
436 networks associated with directly experienced pain and empathy for pain.  
437 *NeuroImage*. 2011;54(3):2492–502.
- 438 27. First M, Spitzer R, Gibbon M, Williams J. Structured Clinical Interview for DSM-IV  
439 Personality Disorders, (SCID-II). Washington DC: American Psychiatric Press, Inc.;  
440 1997.
- 441 28. Garner DM, Olmstead MP, Polivy J. Development and validation of a  
442 multidimensional eating disorder inventory for anorexia nervosa and bulimia.  
443 *International Journal of Eating Disorders*. 1983;2(2):15–34.
- 444 29. Derogatis LR, Rickels K, Rock AF. The SCL-90 and the MMPI: a step in the validation  
445 of a new self-report scale. *The British Journal of Psychiatry*. 1976;128:280–9.
- 446 30. Baron-Cohen S, Wheelwright S. The empathy quotient: an investigation of adults with  
447 Asperger syndrome or high functioning autism, and normal sex differences. *Journal of*  
448 *Autism and Developmental Disorders*. 2004;34(2):163–75.
- 449 31. Bagby RM, Parker JD, Taylor GJ. The twenty-item Toronto Alexithymia Scale--I. Item  
450 selection and cross-validation of the factor structure. *Journal of Psychosomatic*  
451 *Research*. 1994;38(1):23–32.

- 452 32. Derntl B, Finkelmeyer A, Voss B, Eickhoff SB, Kellermann T, Schneider F, et al.  
453 Neural correlates of the core facets of empathy in schizophrenia. *Schizophrenia*  
454 *Research*. 2012;136(1–3):70–81.
- 455 33. Derntl B, Habel U, Windischberger C, Robinson S, Kryspin-Exner I, Gur RC, et al.  
456 General and specific responsiveness of the amygdala during explicit emotion  
457 recognition in females and males. *BMC Neuroscience*. 2009;10:91.
- 458 34. Derntl B, Finkelmeyer A, Toygar TK, Hülsmann A, Schneider F, Falkenberg DI, et al.  
459 Generalized deficit in all core components of empathy in schizophrenia.  
460 *Schizophrenia Research*. 2009;108(1–3):197–206.
- 461 35. Derntl B, Finkelmeyer A, Eickhoff S, Kellermann T, Falkenberg DI, Schneider F, et al.  
462 Multidimensional assessment of empathic abilities: Neural correlates and gender  
463 differences. *Psychoneuroendocrinology*. 2010;35(1):67–82.
- 464 36. Genovese CR, Lazar NA, Nichols T. Thresholding of statistical maps in functional  
465 neuroimaging using the false discovery rate. *NeuroImage*. 2002;15(4):870–8.
- 466 37. Yuan B-K, Zang Y-F, Liu D-Q. Influences of Head Motion Regression on High-  
467 Frequency Oscillation Amplitudes of Resting-State fMRI Signals. *Frontiers in Human*  
468 *Neuroscience*. 2016;10:243.
- 469 38. Boghi A, Sterpone S, Sales S, D’Agata F, Bradac GB, Zullo G, et al. In vivo evidence  
470 of global and focal brain alterations in anorexia nervosa. *Psychiatry Research*.  
471 2011;192(3):154–9.
- 472 39. Matsuda H, Mizumura S, Nemoto K, Yamashita F, Imabayashi E, Sato N, et al.  
473 Automatic voxel-based morphometry of structural MRI by SPM8 plus diffeomorphic  
474 anatomic registration through exponentiated lie algebra improves the diagnosis of

- 475           probable Alzheimer Disease. *American Journal of Neuroradiology*. 2012;33(6):1109–  
476           14.
- 477   40. Abbate-Daga G, Marzola E, Gramaglia C, Brustolin A, Campisi S, De-Bacco C, et al.  
478           Emotions in eating disorders: changes of anger control after an emotion-focused day  
479           hospital treatment. *European Eating Disorders Review*. 2012;20(6):496–501.
- 480   41. Beadle JN, Paradiso S, Salerno A, McCormick LM. Alexithymia, emotional empathy,  
481           and self-regulation in anorexia nervosa. *Annals of Clinical Psychiatry*.  
482           2013;25(2):107–20.
- 483   42. Cardi V, Corfield F, Leppanen J, Rhind C, Deriziotis S, Hadjimichalis A, et al.  
484           Emotional Processing, Recognition, Empathy and Evoked Facial Expression in Eating  
485           Disorders: An Experimental Study to Map Deficits in Social Cognition. *PloS one*.  
486           2015;10(8):e0133827.
- 487   43. Pedersen SH, Lunn S, Katznelson H, Poulsen S. Reflective Functioning in 70 Patients  
488           Suffering from Bulimia Nervosa. *European Eating Disorders Review*. 2012;20(4):303–  
489           10.
- 490   44. Pedersen SH, Poulsen S, Lunn S. Eating Disorders and Mentalization: High  
491           Reflective Functioning in Patients with Bulimia Nervosa. *Journal of the American*  
492           *Psychoanalytic Association*. 2015;63(4):671–94.
- 493   45. Maier S, Spiegelberg J, van Zutphen L, Zeeck A, Tebartz van Elst L, Hartmann A, et  
494           al. Neurobiological signature of intimacy in anorexia nervosa. *European Eating*  
495           *Disorders Review*. 2019;27(3):315–22.

- 496 46. van Zutphen L, Maier S, Siep N, Jacob GA, Tüscher O, van Elst LT, et al. Intimate  
497 stimuli result in fronto-parietal activation changes in anorexia nervosa. *Eating and*  
498 *Weight Disorders*. 2018;24(6):1155–64.
- 499 47. Tabibnia G, Zaidel E. Alexithymia, interhemispheric transfer, and right hemispheric  
500 specialization: a critical review. *Psychotherapy and psychosomatics*. 2005;74(2):81–  
501 92.
- 502 48. Bruch, H. Anorexia nervosa: Therapy and theory. *The American Journal of*  
503 *Psychiatry*. 1982;139:1531–38.
- 504 49. Amianto F, Northoff G, Abbate-Daga G, Fassino S, Tasca GA. Is Anorexia Nervosa a  
505 disorder of the self? A Psychological Approach. *Frontiers in Psychology*. 2016;7:849.



**HOW WOULD YOU FEEL IF YOU ARE EXPERIENCING THIS SITUATION?  
WHICH FACIAL EXPRESSION WOULD YOU SHOW?**

**A big dog barks and  
growls at you**

**7 sec**

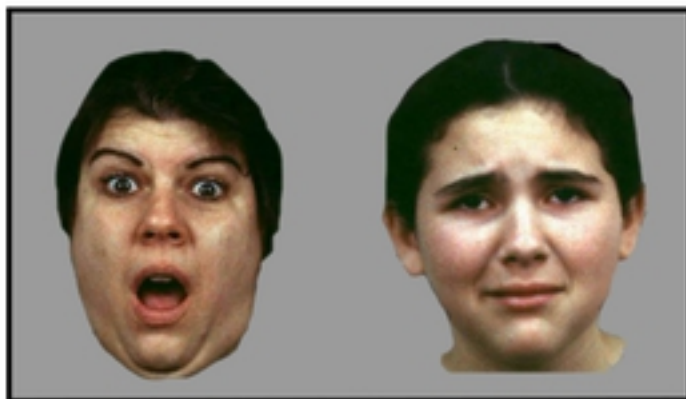

**7 sec**

**+**

**7 sec**

Figure 1

**L**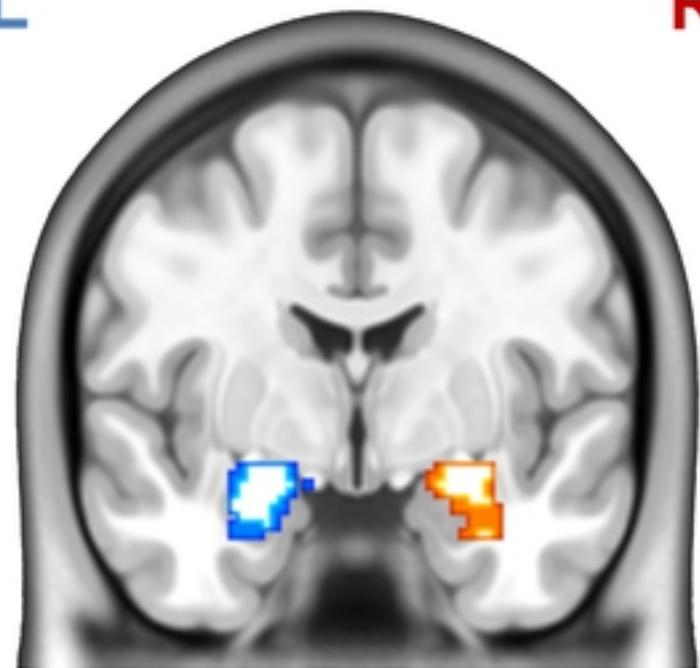**R**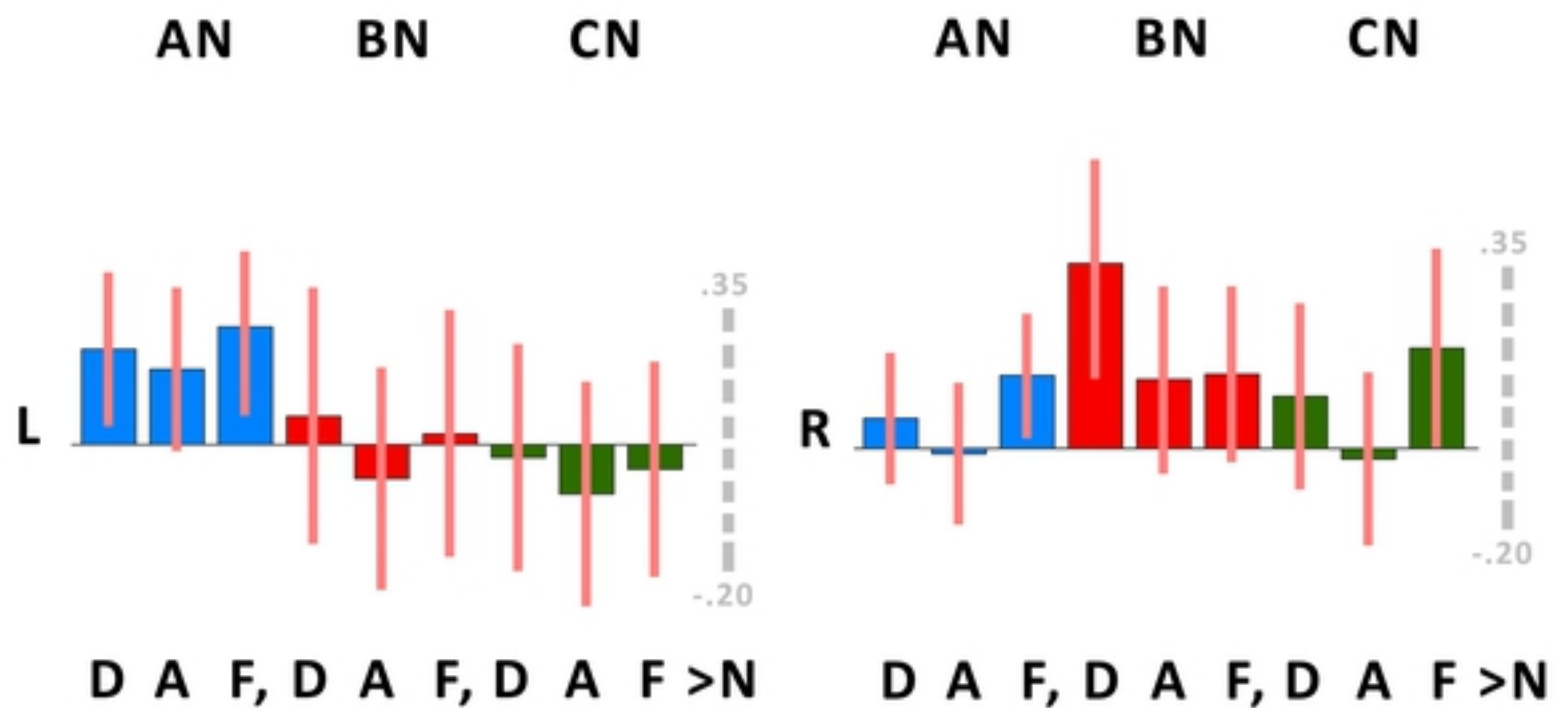

Figure 2
